# Supplementary material for: Catalyzing carbonization of poly(l-lactide) by nanosized carbon black combined with Ni2O3 for improving flame retardancy
Source: Royal Society of Chemistry journal article supplement (doi:10.1039/c2jm33689h), 2012-01-01
Supplement: c2jm33689h.pdf [file c2jm33689h.pdf]

## Supporting information

# Catalyzing Carbonization of Poly(L-lactide) by Nanosized Carbon Black Combined with Ni<sub>2</sub>O<sub>3</sub> for Improving Flame Retardancy

Xin Wen, Jiang Gong, Haiou Yu, Zhi Liu, Dong Wan, Jie Liu, Zhiwei Jiang, and Tao Tang\*

5

10

15

20

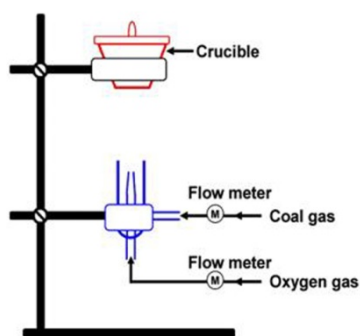

Fig. S1. Schematic diagram of the combustion equipment.

25

30

35

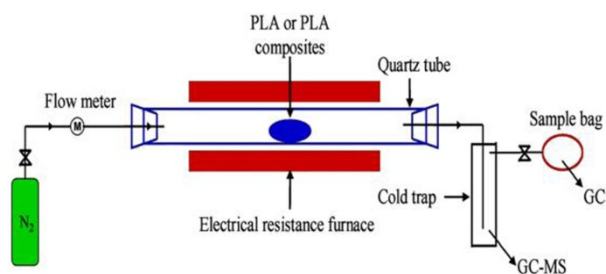

Fig. S2. Schematic diagram of the catalytic pyrolysis for neat PLA and its composites.

40

Table S1 Percentages of various functional groups from the residual char of PLA samples.

| Sample    | C-C (%) | C-O (%) | C=O (%) | O=C-O (%) |
|-----------|---------|---------|---------|-----------|
| PLA5CB    | 35.56   | 41.84   | 13.81   | 8.79      |
| PLA5CB5Ni | 68.03   | 13.32   | 14.27   | 4.38      |
| PLA5Ni    | 67.43   | 8.86    | 11.00   | 12.71     |

45
